# Supplementary material
Source: PubMed Central journal article supplement (PMC2453091)

Supplemental Fig1

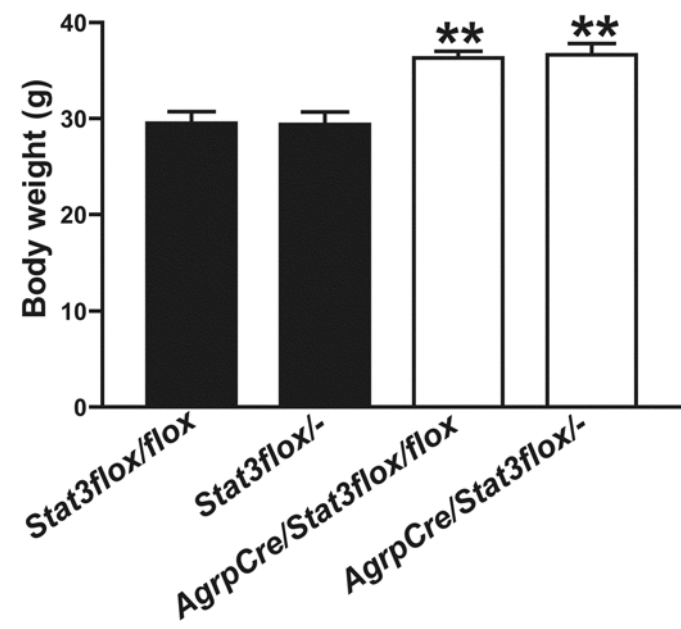

Supplement: en.2007-0945_2.pdf [file en.2007-0945_2.pdf]

Supplemental Fig2

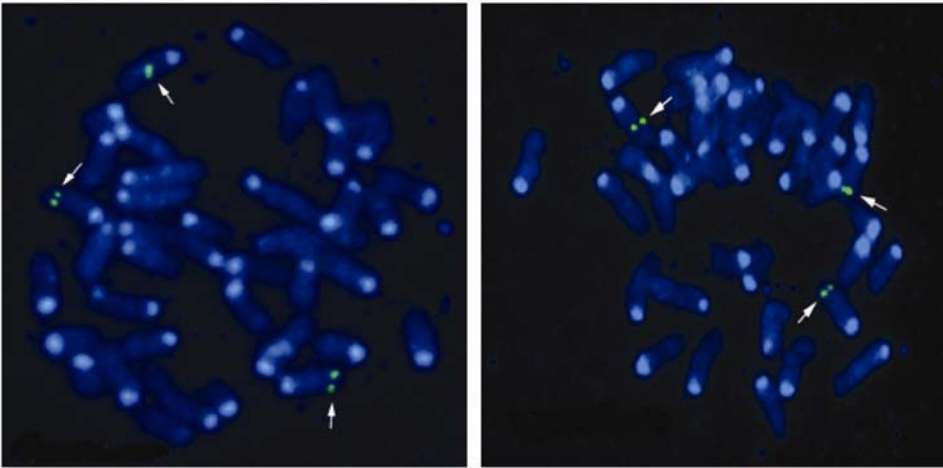

Supplement: en.2007-0945_3.pdf [file en.2007-0945_3.pdf]

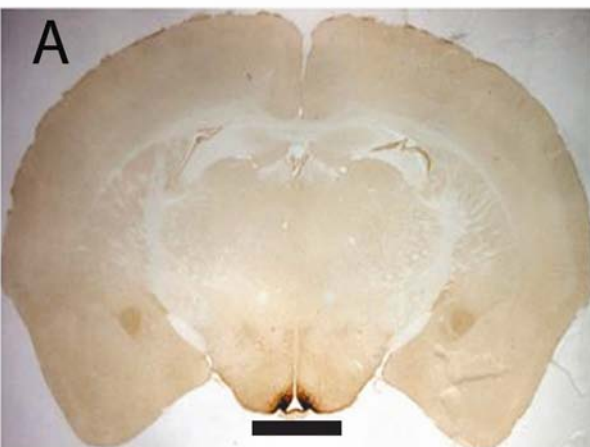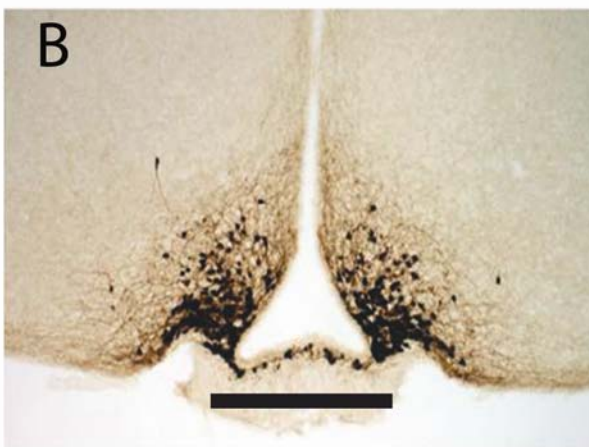

Supplement: en.2007-0945_4.pdf [file en.2007-0945_4.pdf]
